# Supplementary material for: Fc-engineered antibodies promote neutrophil-dependent control of Mycobacterium tuberculosis
Source: PubMed Central journal article supplement — Nat Microbiol. 2024 Aug 22;9(9):2369–82. doi: 10.1038/s41564-024-01777-9 (PMC11371646; doi:10.1038/s41564-024-01777-9), 2024-08-22
Supplement: 41564_2024_1777_MOESM1_ESM.pdf [file 41564_2024_1777_MOESM1_ESM.pdf]

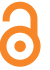

---

# **Fc-engineered antibodies promote neutrophil-dependent control of *Mycobacterium tuberculosis***

---

In the format provided by the  
authors and unedited

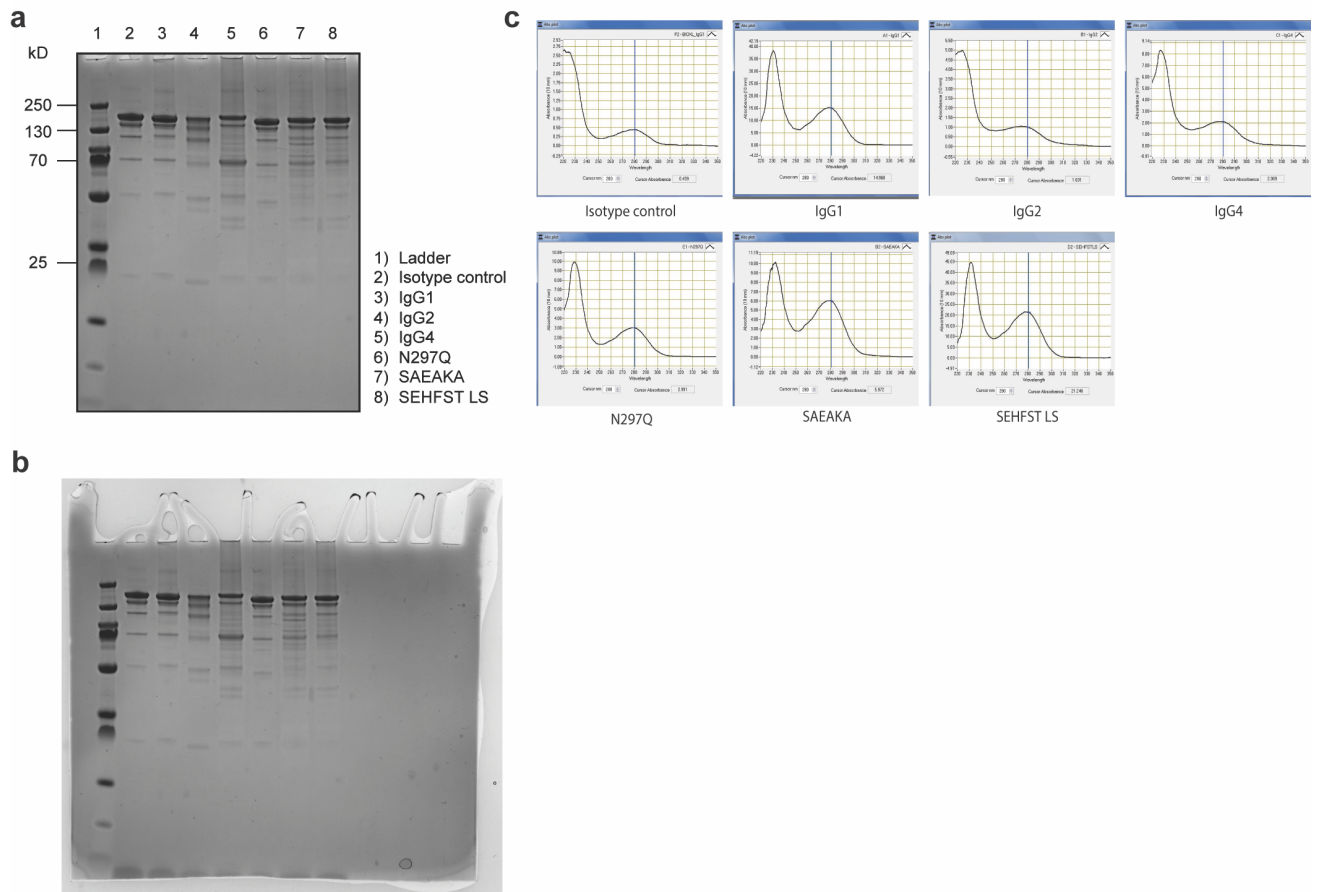

**Supplementary Fig. 1 | Biochemical quality of antibodies utilized in depletion experiments. a,** Non-reducing gel analysis performed once on a batch of 24c5 Fc-variants. **b,** Unprocessed non-reducing gel (source data) associated with panel a. **c,** A280 measurements of select 24c5 Fc-variants.

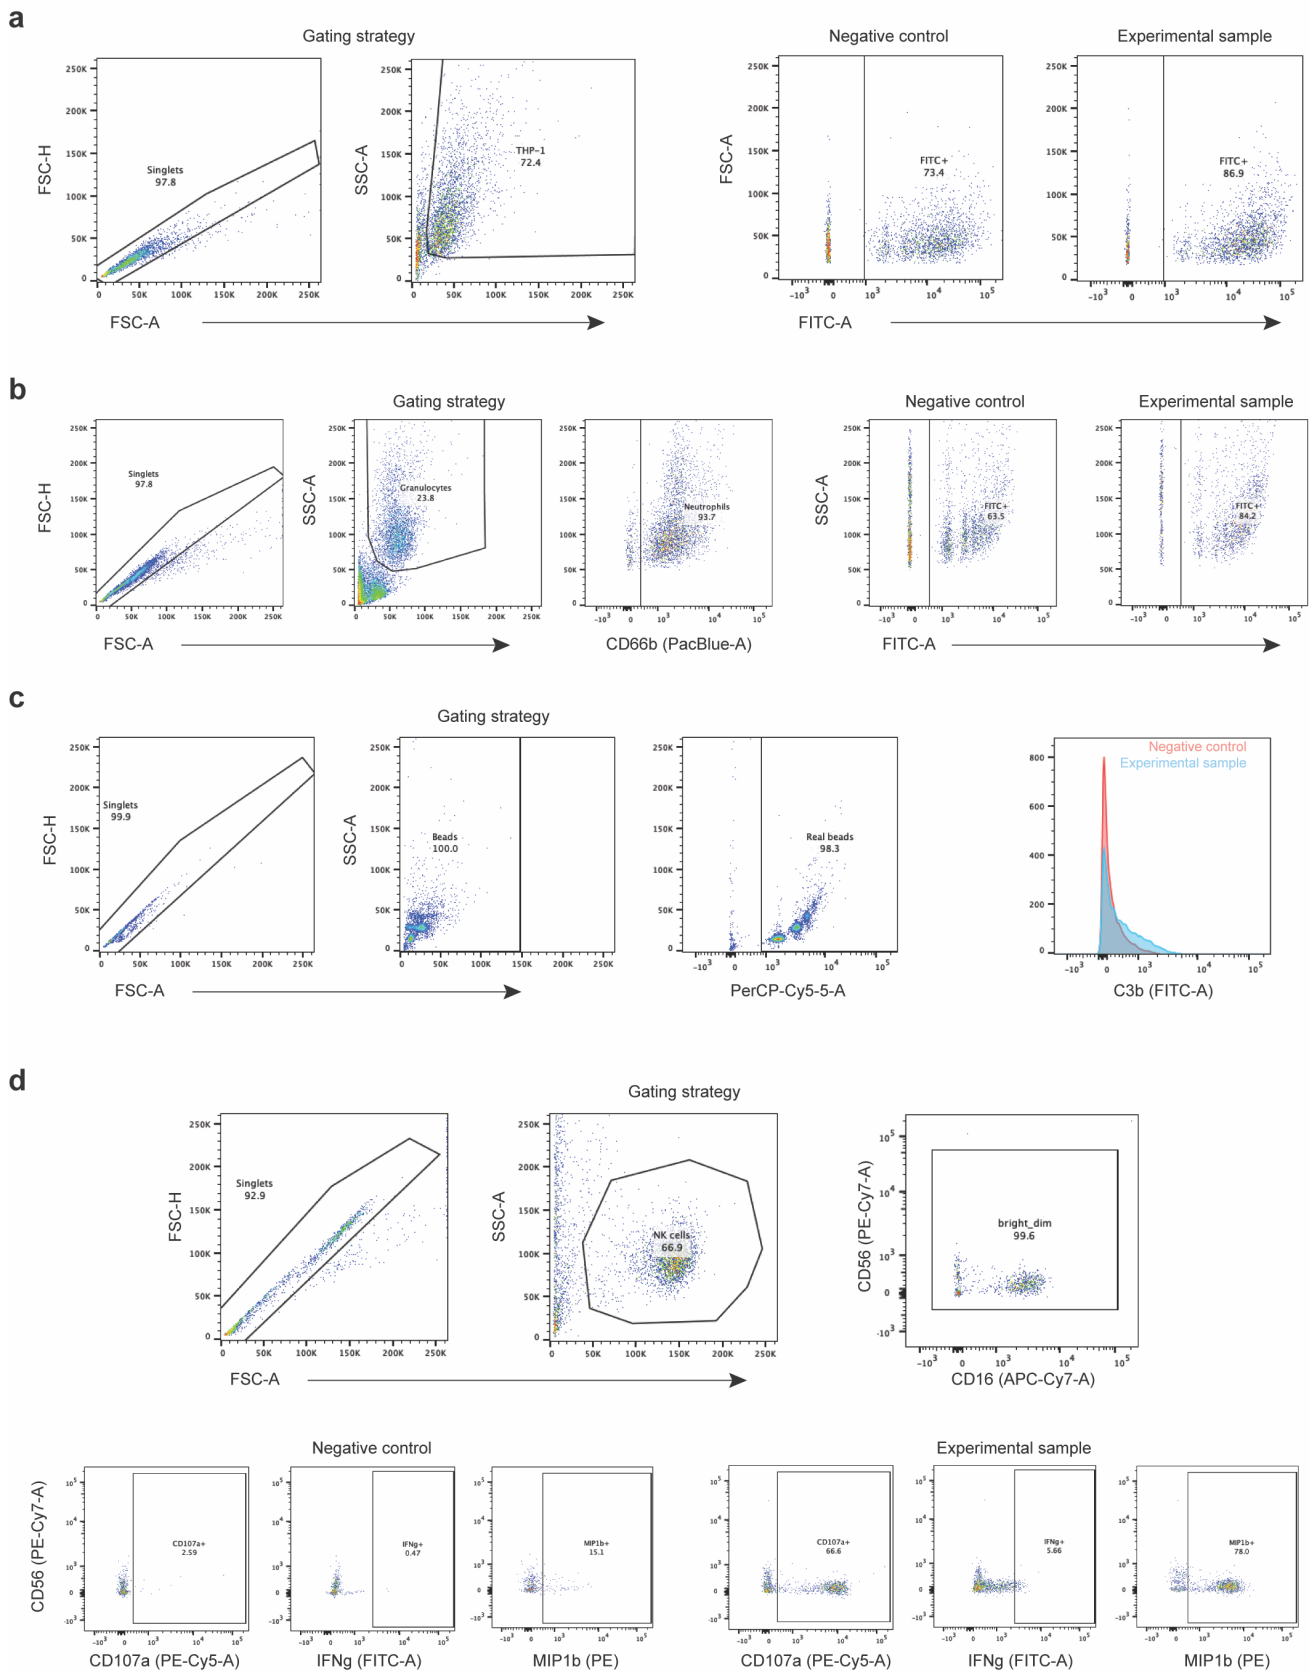

**Supplementary Fig. 2 | Gating strategies for antibody functional assays. a,** Antibody-dependent cellular phagocytosis (ADCP). **b,** Antibody-dependent neutrophil phagocytosis. **c,** Antibody-dependent complement deposition (ADCD). **d,** Antibody-dependent NK cell activation (ADNKA).
